# Supplementary material
Source: MDPI journal article supplement (https://www.mdpi.com/2073-4441/10/12/1730)
Supplement: s1 [file s1]

**Table S3. Changes in the LC-OCD fractions concentration in batch reactors at different temperatures under oxic conditions using different water types (DC, DCWW, WW and WEOM)**

| Feed water type |                | BP<br>( $\mu\text{g}\cdot\text{L}^{-1}$ ) | HS<br>( $\mu\text{g}\cdot\text{L}^{-1}$ ) | LMWn<br>( $\mu\text{g}\cdot\text{L}^{-1}$ ) | LMWa<br>( $\mu\text{g}\cdot\text{L}^{-1}$ ) |
|-----------------|----------------|-------------------------------------------|-------------------------------------------|---------------------------------------------|---------------------------------------------|
| DC              | Influent       | 562                                       | 7860                                      | 1350                                        | 200                                         |
|                 | Effluent-30 °C | 74.7                                      | 8070                                      | 1080                                        | 172                                         |
|                 | Effluent-25 °C | 32.2                                      | 7520                                      | 993                                         | 145                                         |
|                 | Effluent-20 °C | 28.8                                      | 7310                                      | 907                                         | 123                                         |
| DCWW            | Influent       | 497                                       | 7670                                      | 1120                                        | 194                                         |
|                 | Effluent-30 °C | 20                                        | 7780                                      | 940                                         | 120                                         |
|                 | Effluent-25 °C | 45                                        | 7120                                      | 945                                         | 108                                         |
|                 | Effluent-20 °C | 61                                        | 5990                                      | 890                                         | 113                                         |
| WW              | Influent       | 360                                       | 6610                                      | 1200                                        | 224                                         |
|                 | Effluent-30 °C | 22                                        | 6710                                      | 1130                                        | 160                                         |
|                 | Effluent-25 °C | 51                                        | 5890                                      | 1060                                        | 133                                         |
|                 | Effluent-20 °C | 62                                        | 5540                                      | 940                                         | 118                                         |
| WEOM            | Influent       | 1420                                      | 10900                                     | 1250                                        | 118                                         |
|                 | Effluent-30 °C | 24.7                                      | 6730                                      | 665                                         | 146                                         |
|                 | Effluent-25 °C | 40.3                                      | 6440                                      | 614                                         | 91.8                                        |
|                 | Effluent-20 °C | 38.6                                      | 6160                                      | 542                                         | 106                                         |
