# Supplementary material
Source: MDPI journal article supplement (https://www.mdpi.com/2073-4441/10/12/1730)
Supplement: s1 [file s1]

**Table S2: SUVA ( $L \cdot mg^{-1} \cdot m^{-1}$ ) values of the batch effluents at different temperatures (20, 25, 30°C) and biotic/abiotic conditions under oxic condition**

|       |         | <b>DC</b> | <b>DCWW</b> | <b>WW</b> | <b>WEOM</b> |
|-------|---------|-----------|-------------|-----------|-------------|
| IC    |         | 2.84      | 2.37        | 2.56      | 3.56        |
| 30 °C | biotic  | 3.71      | 3.44        | 3.75      | 4.77        |
| 30 °C | Abiotic | 3.68      | 3.69        | 3.72      | 3.83        |
| 25 °C | biotic  | 3.59      | 3.19        | 3.65      | 4.39        |
| 25 °C | Abiotic | 3.41      | 3.58        | 3.62      | 4.23        |
| 20 °C | biotic  | 3.57      | 3.18        | 3.59      | 4.26        |
| 20 °C | Abiotic | 3.43      | 3.71        | 3.64      | 4.89        |
