# Supplementary material
Source: MDPI journal article supplement (https://www.mdpi.com/2073-4441/10/12/1730)
Supplement: s1 [file s1]

*Table S1. The spectral slopes of the identified components and their corresponded components in previous studies from the OpenFluor database*

|    | Ex.<br>wavelength<br>(nm) | Em.<br>wavelength<br>(nm) | Similarity<br>score | previous study               | Component<br>type                           |
|----|---------------------------|---------------------------|---------------------|------------------------------|---------------------------------------------|
| C1 | 248,324                   | 412                       | 0.96                | (Graeber, et al., 2012)      | Terrestrial<br>humic                        |
| C2 | 244,376                   | 482                       | 0.99                | (Shutova, et al., 2014)      | Terrestrial<br>humic, Higher<br>aromaticity |
| C3 | 300                       | 406                       | 0.98                | (Walker, et al., 2009)       | Microbial<br>humic                          |
| C4 | 356                       | 436                       | 0.97                | (Osburn, et al., 2016)       | Terrestrial<br>humic, lower<br>aromaticity  |
| C5 | 240,272                   | 322                       | 0.99                | (Kothawala, et al.,<br>2014) | Protein-like                                |
